# Supplementary material for: The significance of soils and soil science towards realization of the United Nations Sustainable Development Goals
Source: Copernicus journal article supplement (doi:10.5194/soil-2-111-2016), 2016-04-07
Supplement: Supplementary file 1 [file soil-2-111-2016-supplement.pdf]

Supplement of SOIL, 2, 111–128, 2016  
<http://www.soil-journal.net/2/111/2016/>  
doi:10.5194/soil-2-111-2016-supplement  
© Author(s) 2016. CC Attribution 3.0 License.

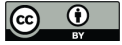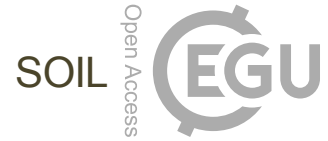

*Supplement of*

## **The significance of soils and soil science towards realization of the United Nations Sustainable Development Goals**

**Saskia D. Keesstra et al.**

*Correspondence to:* S. D. Keesstra (saskia.keesstra@wur.nl)

The copyright of individual parts of the supplement might differ from the CC-BY 3.0 licence.

# The significance of soils and soil science towards realization of the UN sustainable development goals

A GRAPHICAL ABSTRACT

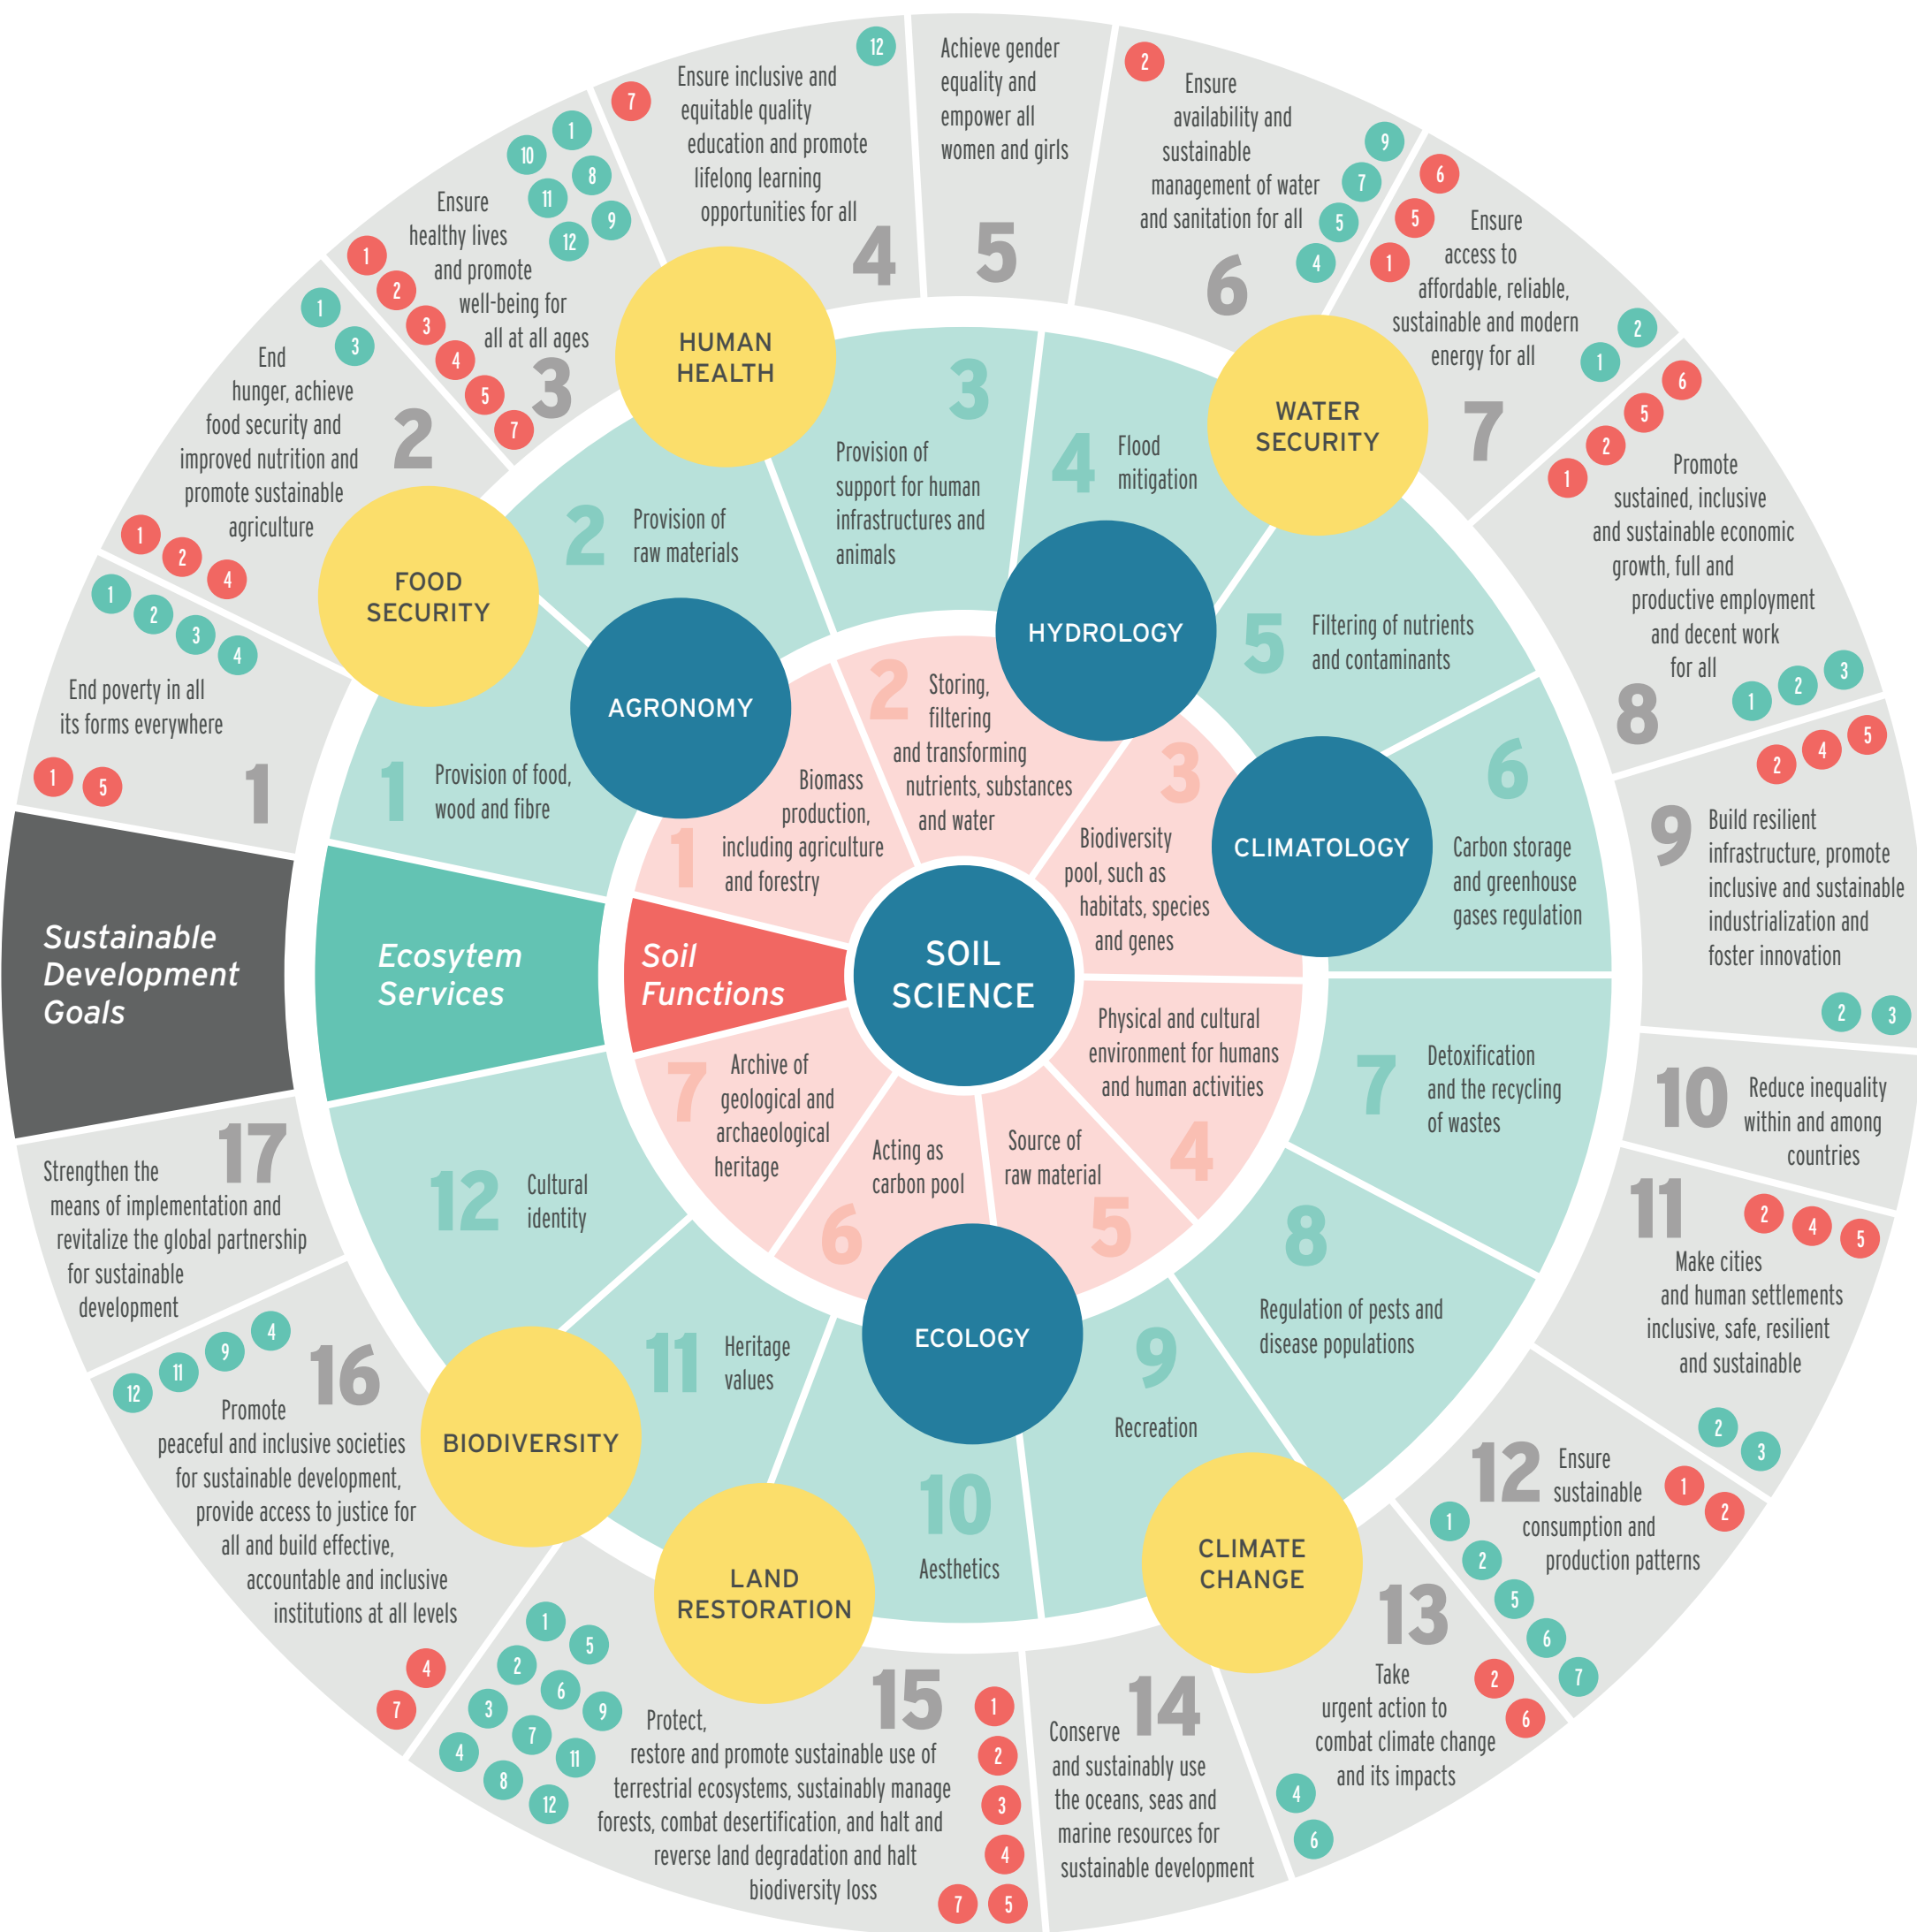

FORUM paper: The significance of soils and soil science towards realization of the UN sustainable development goals (SDGs)  
 Keesstra, S.D., Bouma, J., Wallinga, J., Tittonell, P., Smith, P., Cerdà A., Montanarella, L., Quinton, J., Pachepsky, Y., van der Putten, W.H, Bardgett, R.D, Moolenaar, S., Mol, G., Fresco, L.O.
